# Supplementary material for: Application of glutathione to roots selectively inhibits cadmium transport from roots to shoots in oilseed rape
Source: PubMed Central journal article supplement — J Exp Bot. 2013 Feb 23;64(4):1073–81. doi: 10.1093/jxb/ers388 (PMC3580817; doi:10.1093/jxb/ers388), 2013-02-23
Supplement: supp_ers388_jexbot092510_file001.pdf [file supp_ers388_jexbot092510_file001.pdf]

Title of manuscript: Application of glutathione to roots selectively inhibits cadmium transport from roots to shoots in oilseed rape

List of authors: Shin-ichi Nakamura, Nobuo Suzui, Toshinori Nagasaka, Fumiya Komatsu, Noriko S. Ishioka, Sayuri Ito-Tanabata, Naoki Kawachi, Hiroki Rai, Hiroyuki Hattori, Mitsuo Chino and Shu Fujimaki

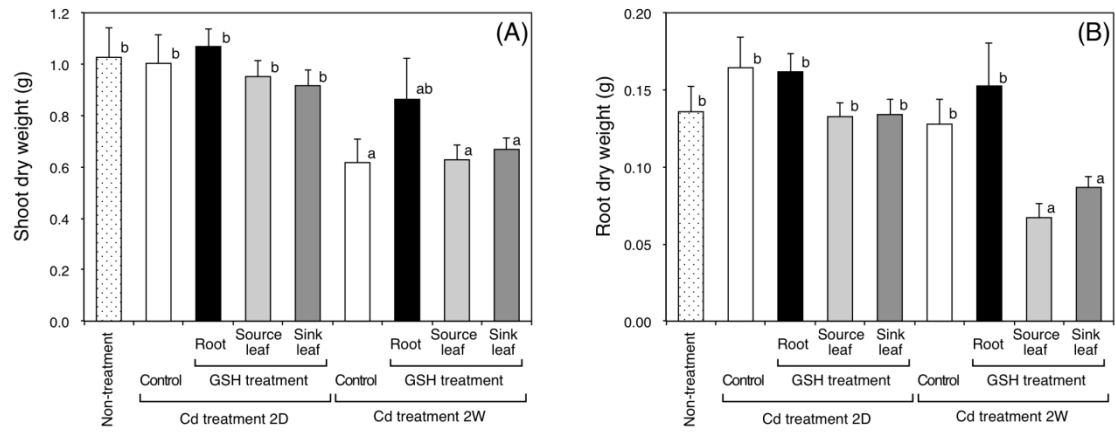

Figure S1

Supplementary Figure S1. Dry weights of shoots and roots of oilseed rape plants harvested after various treatments. Means labeled with different letters are significantly different according to a Student's t-test ( $P < 0.05$ ).

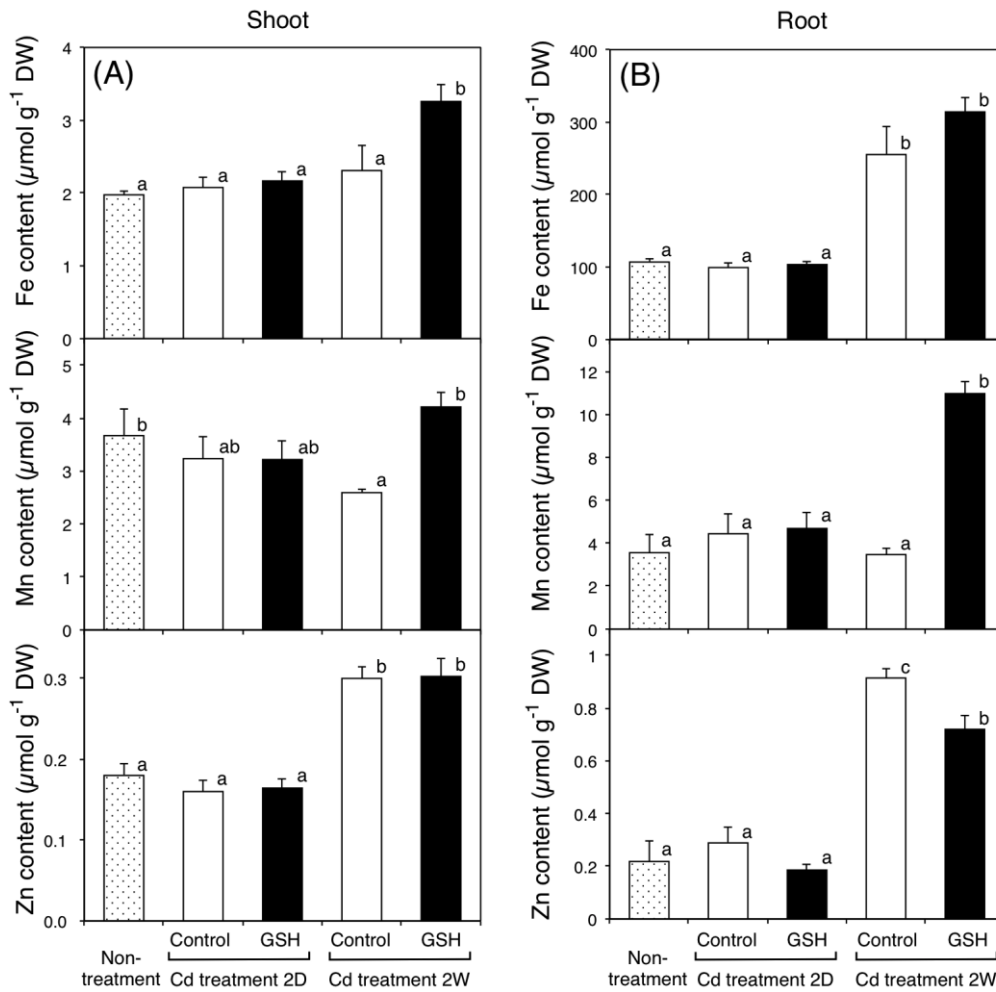

Figure S2

Supplementary Figure S2. Fe, Mn and Zn contents in shoots and roots from oilseed rape plants harvested after various treatments. Means labeled with different letters are significantly different according to a Student's t-test ( $P < 0.05$ ).

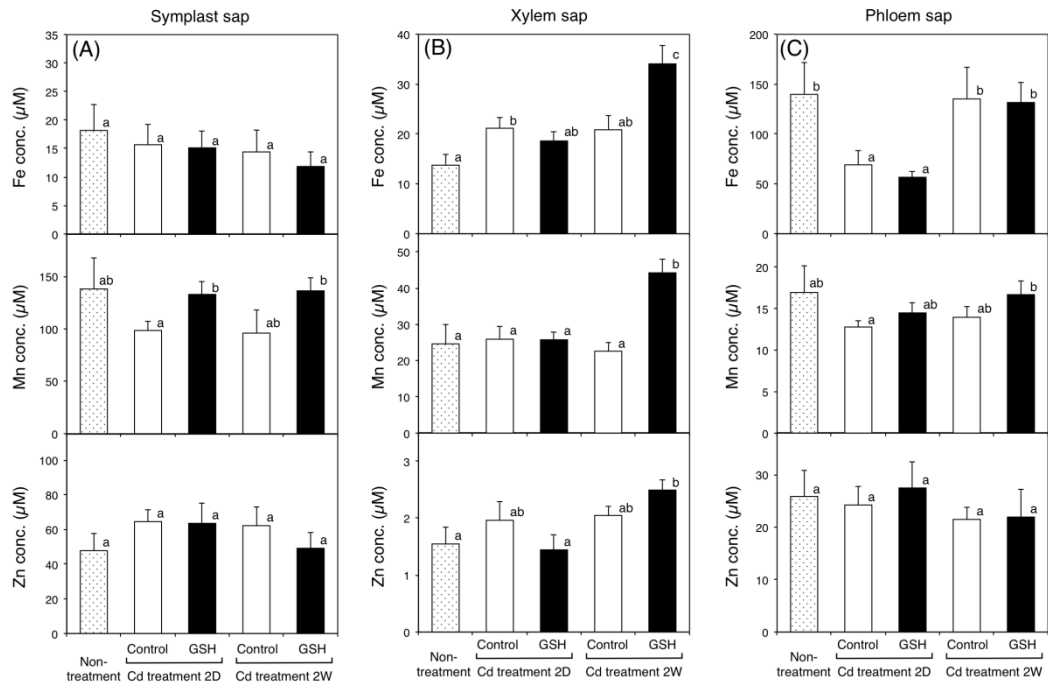

Figure S3

Figure S3

Supplementary Figure S3. Fe, Mn, and Zn concentrations in the symplast sap, xylem sap and phloem sap collected from oilseed rape plants after various treatments. Means labeled with different letters are significantly different according to a Student's t-test ( $P < 0.05$ ).
